# Supplementary material
Source: publisher figshare collection journal article supplement (https://acs.figshare.com/ndownloader/files/24155723)
Supplement: Supplementary file 1 [file 24155723]

## Sheet: FooDB
compound	status
(-)-Gossypol	known
(R)-Kawain	known
1,2,4-Tribromo-5-(2,4-dibromophenoxy)benzene	known
1-(3,4-Dihydroxyphenyl)-7-(4-hydroxy-3-methoxyphenyl)-1,6-heptadiene-3,5-dione	known
12(S)-Leukotriene B4	known
17-Ã«Â±-hydroxypregnenolone	known
2,2',3,4,4',5',6-Heptabromodiphenyl ether	known
2,2',4,4',5,5'-Hexabromodiphenyl ether	known
2,2',4,4',5,6'-Hexabromodiphenyl ether	known
20-Carboxyleukotriene B4	known
20-Hydroxy-leukotriene B4	known
20-Oxo-leukotriene B4	known
3'-Geranyl-2',4,4',6'-tetrahydroxychalcone	known
3,4',7-Trihydroxyflavone	known
4-Aminophenol	known
4-Methylaesculetin	known
5,7-Dimethoxycoumarin	known
9,13-cis-Retinoate	known
Aesculin	known
Aminoadipic acid	known
Angiotensin IV	known
Apigenin	known
Baicalein	known
Bergamottin	known
Caffeic acid ester	known
Celecoxib	known
Chinese tannin	known
Clofenotane	known
Clopidogrel	known
Clotrimazole	known
Columbianetin	known
Cortisol	known
Curcumin	known
Demethoxycurcumin	known
Endrin	known
Fenbendazole	known
Fisetin	known
Glyceryl lactopalmitate	known
Gummosinin	known
Harmalol	known
Harmine	known
Harmol	known
Hexabromodiphenyl ethers	known
Hypericin	known
Isosilybin	known
Kaempferol	known
L-threo-sphinganine	known
Luteolin 7-rhamnosylglucoside	known
Marmesin galactoside	known
Marmesin rhamnoside	known
Marmesin rutinoside	known
Myricetin 3-digalactoside	known
Na-Formyl-1-methyl-b-carboline	known
Phenylpropanolamine	known
Quercetin	known
Rhamnetin	known
Rose bengal	known
Rosmarinic acid	known
Salsolinol-1-carboxylate	known
Sanguinarine	known
Saponins	known
Scopoletin	known
Sennoside A	known
Silibinin	known
Triamterene	known
Tricetin	known
Vanillylmandelic acid	known
Xanthoangelol	known
alpha-Mangostin	known
benzylbenzoate	known
dihydrosphingosine	known
vanillyl mandelate	known
(15a,20R)-Dihydroxypregn-4-en-3-one	pred
(22E,24R)-Stigmasta-4,22-diene-3,6-dione	pred
(22Ã«Â±)-hydroxy-campest-4-en-3-one	pred
(24S)-Ergost-4-en-3-one	pred
(24S)-Ergost-4-ene-3,6-dione	pred
(E)-2',4,4',6'-Tetrahydroxy-3',5'-diprenylchalcone	pred
(E)-26,27-Dinorergosta-4,22-dien-3-one	pred
(Z,Z)-11,14-Eicosadienoic acid	pred
(Z,Z)-5,8-Tetradecadienoic acid	pred
(all-Z)-13,16,19-Docosatrienoic acid	pred
(all-Z)-7,10,13-Docosatrienoic acid	pred
1,1'-Oxybis[2,4-dibromobenzene]	pred
1,3,5-Tribromo-2-(2,4-dibromophenoxy)benzene	pred
1,3-Diphenyl-1-propanone	pred
1,4-Dimethylnapthalene	pred
1,7-Dihydroxy-3,6-dimethoxy-2,8-diprenylxanthone	pred
1-Dehydro-[10]-gingerdione	pred
1-Dehydro-[6]-gingerdione	pred
1-Hydroxy-3,6,7-trimethoxy-2,8-diprenylxanthone	pred
1-Methylnaphthalene	pred
1-Phenyl-1,3-docosanedione	pred
1-Phenyl-1,3-dodecanedione	pred
1-Phenyl-1,3-eicosanedione	pred
1-Phenyl-1,3-heneicosanedione	pred
1-Phenyl-1,3-heptadecanedione	pred
1-Phenyl-1,3-hexadecanedione	pred
1-Phenyl-1,3-nonadecanedione	pred
1-Phenyl-1,3-octadecanedione	pred
1-Phenyl-1,3-pentadecanedione	pred
10,11-Dihydro-leukotriene B4	pred
10-Dehydrogingerdione	pred
11-Epi-PGF2a	pred
11beta-Hydroxyandrost-4-ene-3,17-dione	pred
11beta-Hydroxyprogesterone	pred
13-HOTE	pred
15-Epi-lipoxin A4	pred
16-Dehydroprogesterone	pred
16-alpha-Hydroxypregnenolone	pred
16alpha-Hydroxyandrost-4-ene-3,17-dione	pred
17-Hydroxyprogesterone	pred
17Ã«_-estradiol	pred
19-Oxotestosterone	pred
19-oxo-testosterone	pred
19-oxoandrostenedione	pred
2,4-Dibromo-1-(4-bromophenoxy)benzene	pred
2,6-dimethylnaphthalene	pred
2-(4-Methyl-5-thiazolyl)ethyl decanoate	pred
2-(4-Methyl-5-thiazolyl)ethyl hexanoate	pred
2-(4-Methyl-5-thiazolyl)ethyl octanoate	pred
2-Methylnaphthalene	pred
20-COOH-10,11-dihydro-LTB4	pred
20-Hydroxyeicosatetraenoic acid	pred
20alpha-Dihydroprogesterone	pred
21-Hydroxypregnenolone	pred
3',4',5'-Trimethoxyflavone	pred
3'-Geranyl-2',3,4,4'-tetrahydroxychalcone	pred
3,3',4',7,8-Pentamethylgossypetin	pred
3,5-Dihydroxyergosta-7,22-dien-6-one	pred
3-Hydroxyflavone	pred
3a,7a-Dihydroxy-5b-cholestanate	pred
4',5,7-Trimethylapigenin	pred
4',5-Dihydroxy-7-methoxy-6-methylflavone	pred
4'-Methylgenkwanin	pred
4-[(2-Hydroxy-1-naphthalenyl)azo]benzenesulfonic acid	pred
4-[(6,7-Dihydroxy-3,7-dimethyl-2-octenyl)oxy]-7H-furo[3,2-g][1]benzopyran-7-one	pred
5'-Methoxybilobetin	pred
5'-Methoxycurcumin	pred
5,6-Dimethoxyflavone	pred
5,7-Dimethoxyisoflavone	pred
5,7-Dimethylchrysin	pred
5,8,11-Eicosatrienoic acid	pred
5-Hydroxy-3,3',4',6,7,8-hexamethoxyflavone	pred
5-Hydroxy-4',7-dimethoxy-6-methylflavone	pred
5-Hydroxy-7-methoxy-6-methylflavone	pred
5-Methoxysalvigenin	pred
5-O-Methylembelin	pred
6,11-Dihydroxy-3-methyl-3-(4-methyl-3-pentenyl)-3H,7H-pyrano[2,3-c]xanthen-7-one	pred
6,7-Dihydro-12-epi-LTB4	pred
6-Deoxy-gamma-mangostin	pred
6-Hydroxy-5-[(4-sulfophenyl)azo]-2-naphthalenesulfonic acid	pred
6-Hydroxyluteolin 6,7,3',4'-tetramethyl ether	pred
7,10-Hexadecadienoic acid	pred
7,4'-Dimethoxyflavone	pred
7-Hydroxy-3,3',4',5,6-pentamethoxyflavone	pred
7-Methoxy-2-methylisoflavone	pred
7-Methylchrysin	pred
7Z,10Z,13Z,16Z,19Z-Docosapentaenoic acid	pred
8,11,14-Eicosatrienoic acid	pred
8,15-DiHETE	pred
8-O-Methyloblongine	pred
9-Hydroxy-4-(3,7-dimethyl-2,6-octadienyloxy)-psoralen	pred
Adrenic acid	pred
Adrenosterone	pred
Alfalone	pred
Amentoflavone	pred
Arachidonic acid	pred
Archangelin	pred
Artemitin	pred
Atroviridin	pred
Aurantiumal	pred
Auraptene	pred
Bargustanine	pred
Bilobetin	pred
Bolasterone	pred
Bryononic acid	pred
C.I. Acid Red 13	pred
C.I. Pigment Yellow 104	pred
CE(10:0)	pred
CE(12:0)	pred
CE(14:0)	pred
CE(14:1(9Z))	pred
CE(16:0)	pred
CE(16:1(9Z))	pred
CE(18:0)	pred
CE(18:1(11Z))	pred
CE(18:1(9Z))	pred
CE(19:0)	pred
CE(20:0)	pred
CE(20:1(11Z))	pred
CE(22:0)	pred
CE(22:1(13Z))	pred
CE(24:0)	pred
CE(24:1(15Z))	pred
CE(5:0)	pred
Cabreuvin	pred
Cajaisoflavone	pred
Calenduloside G methyl ester	pred
Camelledionol	pred
Camellenodiol	pred
Campesteryl brassidate	pred
Campesteryl elaidate	pred
Campesteryl stearate	pred
Cholestenone	pred
Citrunobin	pred
Cobalamin	pred
Cryptogenin	pred
Dalbergin	pred
Dehydroandrosterone	pred
Dehydrogingerdione	pred
Deoxycorticosterone	pred
Desmethylxanthohumol	pred
Dihomolinolenic acid	pred
Dihydrocapsaicin	pred
Diphenylamine	pred
Dulxanthone C	pred
Dulxanthone D	pred
Dulxanthone F	pred
Enilconazole	pred
Epicatechin 3,5-digallate	pred
Epicatechin 3-p-hydroxybenzoate	pred
Erythrodiol 3-decanoate	pred
Erythrodiol 3-palmitate	pred
Ethyltestosterone	pred
Faradiol laurate	pred
Faradiol myristate	pred
Faradiol palmitate	pred
Flavones	pred
Formononetin	pred
Gancaonin P	pred
Ganoderiol H	pred
Garcinone E	pred
Ginkgetin	pred
Gypsogenin 3-O-b-D-glucuronide	pred
Hexadeca-7,10,13-trienoic acid	pred
Hexamethylquercetagetin	pred
Homodihydrocapsaicin	pred
Ipriflavone	pred
Isoformononetin	pred
Isoginkgetin	pred
Isoimperatorin	pred
Isotetrandrine	pred
Kanzonol L	pred
Katononic acid	pred
Kuwanol D	pred
Leukotriene B5	pred
Licoflavonol	pred
Lipoxin B4	pred
Lucidal	pred
Mangostenol	pred
Medicagenic acid 3-O-b-D-glucuronide	pred
Medroxyprogesterone	pred
Momordin Ia	pred
Morachalcone A	pred
Nandrolone	pred
Natsudaidain	pred
Norbolethone	pred
Nordihydrocapsaicin	pred
Norsanguinarine	pred
O-Demethylforbexanthone	pred
Oxyacanthine	pred
Parvisoflavone A	pred
Pelanin	pred
Pregnenolone	pred
Progesterone	pred
Prostaglandin F1a	pred
Protohypericin	pred
Quillaic acid 3-glucuronide	pred
Retinyl ester	pred
Salvigenin	pred
Sayanedin	pred
Sciadonic acid	pred
Secoisotetrandrine	pred
Silandrin	pred
Soyasapogenol B 3-O-b-D-glucuronide	pred
Stigmast-4-ene-3,6-dione	pred
Stigmasta-4-22-dien-3-one	pred
Stigmasteryl palmitate	pred
Stigmasteryl stearate	pred
Tetrabromodiphenyl ethers	pred
Tetracosapentaenoic acid (24:5n-3)	pred
Tetramethoxyluteolin	pred
Tetramethylquercetin	pred
Theadibenzotropolone A	pred
Theaflavate A	pred
Theaflavate B	pred
Theaflavin 3'-gallate	pred
Theaflavin 3,3'-digallate	pred
Theaflavin 3-gallate	pred
Theasaponin E5	pred
Trigraecum	pred
Umbelliprenin	pred
Xanthoangelol B	pred
Xanthoangelol C	pred
Xanthoangelol F	pred
Xanthohumol C	pred
Xanthohumol E	pred
Zosimin	pred
[6]-Dehydrogingerdione	pred
[8]-Dehydrogingerdione	pred
all-cis-7,10,13,16,19-docosapentaenoate	pred
all-trans-18-Hydroxyretinoic acid	pred
alpha-Amyrin cerotate	pred
alpha-Amyrin palmitate	pred
alpha-Amyrin tetratriacontanoate	pred
androst-4-en-3,17-dione	pred
beta-Amyrin palmitate	pred
beta-Mangostin	pred
beta-Sitostenone	pred
beta-Sitosterol behenate	pred
beta-Sitosterol palmitate	pred
cis-8,11,14,17-Eicosatetraenoic acid	pred
di-homo-Ã«_-linolenate	pred
gamma-Mangostin	pred
linoleate	pred
pregn-5-ene-3,20-dione-17-ol	pred
Ã«Â±-linolenate	pred

## Sheet: DrugBank
compound	status
Amiodarone	known
Anthralin	known
Benzyl benzoate	known
Bexarotene	known
Brivudine	known
Candesartan cilexetil	known
Carvedilol	known
Celecoxib	known
Chlorhexidine	known
Cinnarizine	known
Clofazimine	known
Clopidogrel	known
Clotrimazole	known
Crizotinib	known
Curcumin	known
Dalfampridine	known
Dequalinium	known
Diiodohydroxyquinoline	known
Disulfiram	known
Econazole	known
Ergometrine	known
Esculin	known
Etravirine	known
Famotidine	known
Fenofibrate	known
Fulvestrant	known
Gatifloxacin	known
Gefitinib	known
Hydrocortisone	known
Imatinib	known
Irinotecan	known
Isoconazole	known
Isotretinoin	known
Itraconazole	known
Meclizine	known
Methylergometrine	known
Methysergide	known
Metyrosine	known
Miconazole	known
Nelfinavir	known
Raloxifene	known
Rilpivirine	known
Rose bengal	known
Sorafenib	known
Sulconazole	known
Tannic acid	known
Triamterene	known
Triclabendazole	known
Trimethoprim	known
Vemurafenib	known
Adapalene	pred
Albendazole	pred
Amodiaquine	pred
Buclizine	pred
Chlorcyclizine	pred
Dinoprost	pred
Dyclonine	pred
Estradiol	pred
Estradiol cypionate	pred
Estradiol valerate	pred
Ethylhexyl methoxycrylene	pred
Fenofibric acid	pred
Flavone	pred
Flunarizine	pred
Linoleic acid	pred
Medrysone	pred
Meradimate	pred
Methyltestosterone	pred
Metocurine	pred
Niclosamide	pred
Oxaprozin	pred
Prasterone	pred
Pregnenolone	pred
Progesterone	pred
Regorafenib	pred
Testosterone	pred
Tubocurarine	pred
alpha-Linolenic acid	pred
